# Supplementary material for: Acute Exposure to Tris(1,3-dichloro-2-propyl) Phosphate (TDCIPP) Causes Hepatic Inflammation and Leads to Hepatotoxicity in Zebrafish
Source: PubMed Central journal article supplement (PMC4705469; doi:10.1038/srep19045), 2016-01-08
Supplement: srep19045-s1.pdf [file srep19045-s1.pdf]

## Supporting Information

# Acute Exposure to Tris(1,3-dichloro-2-propyl) Phosphate (TDCIPP) Causes Hepatic Inflammation and Leads to Hepatotoxicity in Zebrafish

Chunsheng Liu<sup>1,2,3,\*</sup>, Guanyong Su<sup>4,5</sup>, John P. Giesy<sup>5,6,7</sup>, Robert J. Letcher<sup>4</sup>,  
Guangyu Li<sup>1</sup>, Ira Agrawal<sup>3</sup>, Jing Li<sup>1</sup>, Liqin Yu<sup>1</sup>,  
Jianghua Wang<sup>1</sup>, Zhiyuan Gong<sup>3,\*</sup>

<sup>1</sup>College of Fisheries, Huazhong Agricultural University, Wuhan 430070, China

<sup>2</sup>Collaborative Innovation Center for Efficient and Health Production of Fisheries in Hunan Province

<sup>3</sup>Department of Biological Sciences, National University of Singapore, Singapore 117543, Singapore

<sup>4</sup>Department of Chemistry, Carleton University, Ottawa, Ontario K1S 5B6, Canada

<sup>5</sup>State Key Laboratory of Pollution Control and Resource Reuse, School of the Environment, Nanjing University, Nanjing 210023, China

<sup>6</sup>Department of Veterinary Biomedical Sciences and Toxicology Centre, University of Saskatchewan, Saskatoon, Saskatchewan S7N 5B3, Canada

<sup>7</sup>Department of Zoology and Centre for Integrative Toxicology, Michigan State University, East Lansing, Michigan 48824, United States

### \*Authors for correspondence:

Prof. Chunsheng Liu,  
College of Fisheries,  
Huazhong Agricultural University,  
Wuhan 430070, China  
Tel: 86 27 87282113  
Fax: 86 27 87282114  
Email: [liuchunshengdid@126.com](mailto:liuchunshengdid@126.com)

Prof. Zhiyuan Gong,  
Department of Biological Sciences,  
National University of Singapore,  
Singapore 117543, Singapore  
Tel: 65162860  
Fax: 67792486  
Email: [dbsgzy@nus.edu.sg](mailto:dbsgzy@nus.edu.sg)

**Table S1** Sequences of primers for selected genes

| Gene Name     | Sequence of the primers (5'-3')                                | Amplicon size | Accession number |
|---------------|----------------------------------------------------------------|---------------|------------------|
| <i>tlr18</i>  | Forward: ctagagtggcctcagcaacc<br>Reverse: ctctcatctgggccttcag  | 183 bp        | NM_001089350.1   |
| <i>tlr8a</i>  | Forward: tgaggacgtgattgttctgc<br>Reverse: gcctggtgtcgcactcgat  | 171 bp        | AY389452.1       |
| <i>tlr8b</i>  | Forward: tgaagagggtgtggatgtga<br>Reverse: caaacctaaccgcgtttctc | 170 bp        | AY389453.1       |
| <i>tlr20a</i> | Forward: ttcgagaggctttgcgat<br>Reverse: tgtcgtgtcccaactgaaag   | 178 bp        | AY389457.1       |
| <i>tlr9</i>   | Forward: atgcccacaaccagctctc<br>Reverse: gtaaaaggtgccgtttgga   | 196 bp        | NM_001130594.1   |
| <i>fos</i>    | Forward: gctccatctcagtcagag<br>Reverse: agagtgggctccagatcaga   | 160 bp        | NM_205569.1      |
| <i>stat1b</i> | Forward: ctccaggcactttccttctg<br>Reverse: cattggagcagcaagtgtgt | 185 bp        | NM_200091.2      |
| <i>irf7</i>   | Forward: gctcagtcagcaatcaca<br>Reverse: cgtatttgctcccctcag     | 167 bp        | NM_200677.1      |
| <i>gclc</i>   | Forward: aaaatgtccggaactgatcg<br>Reverse: aacgttccatttctgttc   | 157 bp        | NM_199277.2      |
| <i>gsr</i>    | Forward: caacctgaaaaggcagaaa<br>Reverse: aaactggatcctggcacatc  | 171 bp        | NM_001020554.1   |
| <i>nqo1</i>   | Forward: ctcaaggattgccttcagc<br>Reverse: cgcagcactccattctgtaa  | 169 bp        | NM_001204272.1   |
| <i>chop</i>   | Forward: atatactgggctccgacacg<br>Reverse: ttcgttcttctgccttgg   | 198 bp        | NM_001082825.1   |
| <i>grp78</i>  | Forward: caagaagaagacgggcaaag<br>Reverse: ctctcaacttgctctgg    | 178 bp        | NM_213058.1      |
| <i>il1b</i>   | Forward: cgctccacatctcgactca<br>Reverse: atacgcggtgctgataaac   | 166 bp        | NM_212844.2      |
| <i>il4</i>    | Forward: gtgaatgggatcctgaatgg<br>Reverse: ttccagtcccgtatgct    | 190 bp        | NM_001170740.1   |
| <i>il6</i>    | Forward: tcctggtgaacgacatcaaa<br>Reverse: tcatcacgctggagaagttg | 177 bp        | NM_001261449.1   |
| <i>il10</i>   | Forward: attgtggagggttcttctt<br>Reverse: agagctgttggcagaatggt  | 198 bp        | NM_001020785.2   |
| <i>il22</i>   | Forward: cttggaatcagacgagcaca<br>Reverse: ggccaaatccataattgcac | 175 bp        | NM_001020792.1   |

**Table S1-Continued**

| Gene Name    | Sequence of the primers (5'-3')                                | Amplicon size | Accession number |
|--------------|----------------------------------------------------------------|---------------|------------------|
| <i>il13</i>  | Forward: tcgggttttacgttgaaagg<br>Reverse: atctcctcctcagcctgaca | 197 bp        | NM_001199905.1   |
| <i>il15</i>  | Forward: ccagaacagggactggaaga<br>Reverse: ccctggtgagtcttctcctg | 192 bp        | NM_001039565.1   |
| <i>il12a</i> | Forward: gaactcctacaagcccagca<br>Reverse: cggatgtgaaacccttcagt | 185 bp        | NM_001007107.1   |
| <i>il26</i>  | Forward: aatgcagaactgtgcgactg<br>Reverse: cctgaactgatccacagcaa | 156 bp        | NM_001020799.1   |
| <i>il34</i>  | Forward: gaacatccacacgcatgaac<br>Reverse: aaaatgaaggagctggctga | 160 bp        | NM_001082955.1   |
| <i>gapdh</i> | Forward: gatacacggagcaccagggt<br>Reverse: gccatcaggtcacatacacg | 163 bp        | NM_001115114.1   |

Table S2 Number of clean reads and mapped reads, and their percentage (clean reads/clean reads) in control and TDCPP treatment groups.

|              | Control-1  | Control-2  | TDCPP-1    | TDCPP-2    |
|--------------|------------|------------|------------|------------|
| Clean reads  | 52,451,294 | 52,208,818 | 55,223,302 | 54,749,504 |
| Mapped reads | 35,069,242 | 35,194,969 | 37,665,881 | 37,621,973 |
| Percentage   | 66.86%     | 67.41%     | 62.21%     | 68.72%     |

**Figure S1**

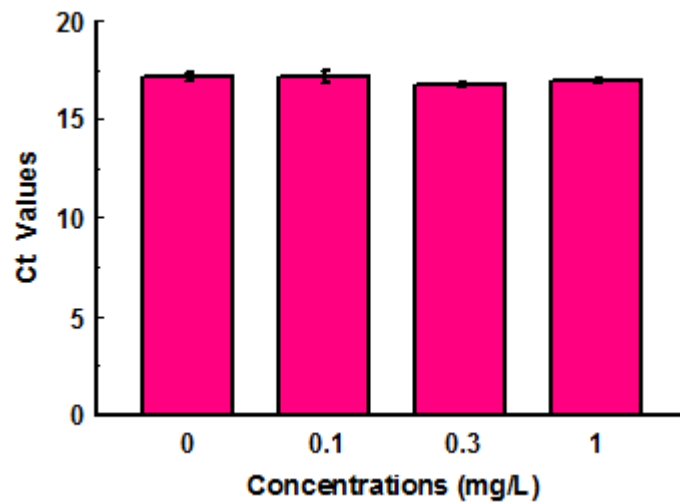

**Figure S1:** Actual cycle threshold (Ct) values for glyceraldehyde-3-phosphate dehydrogenase (*gapdh*) in response to different concentrations of TDCIPP. Values represent mean  $\pm$  SEM. There were 3 replicated tanks for each concentration, and three fish from each tank were used and thus totally 9 fish were involved in each treatment.

**Figure S2**

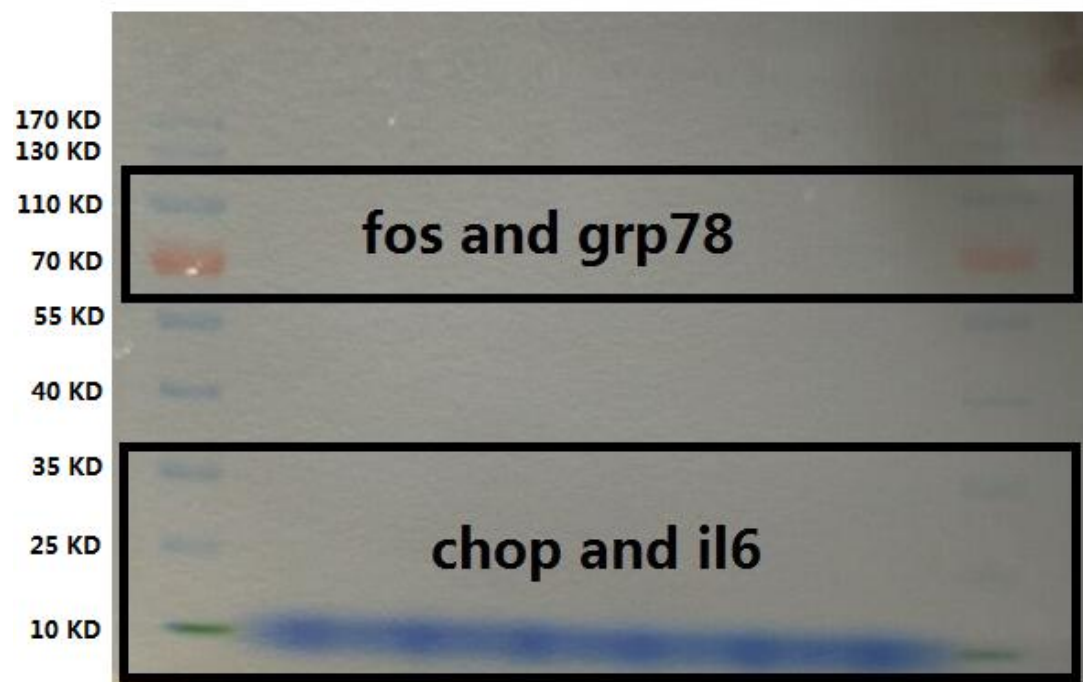

**Figure S2:** Positions where membrane strips were obtained according to molecular weights of marker.

Figure S3

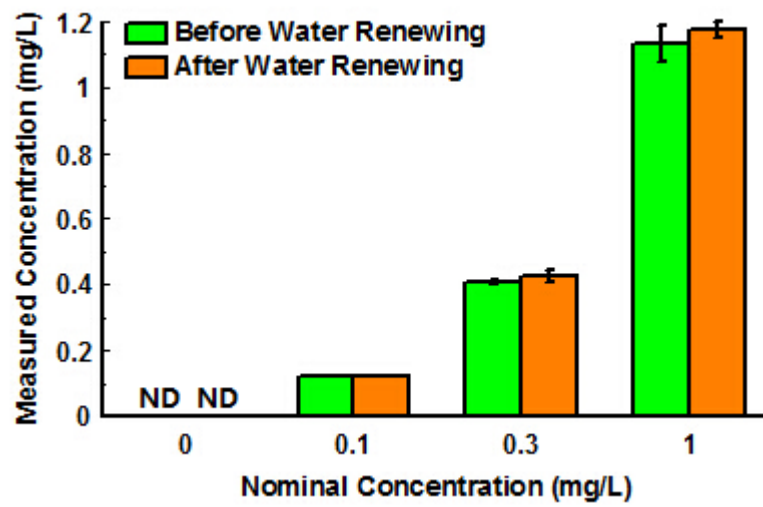

**Figure S3:** Measured concentrations of TDCIPP in exposure solutions at the last day of treatment. Value represent mean  $\pm$  SE (n=3).

**Figure S4**

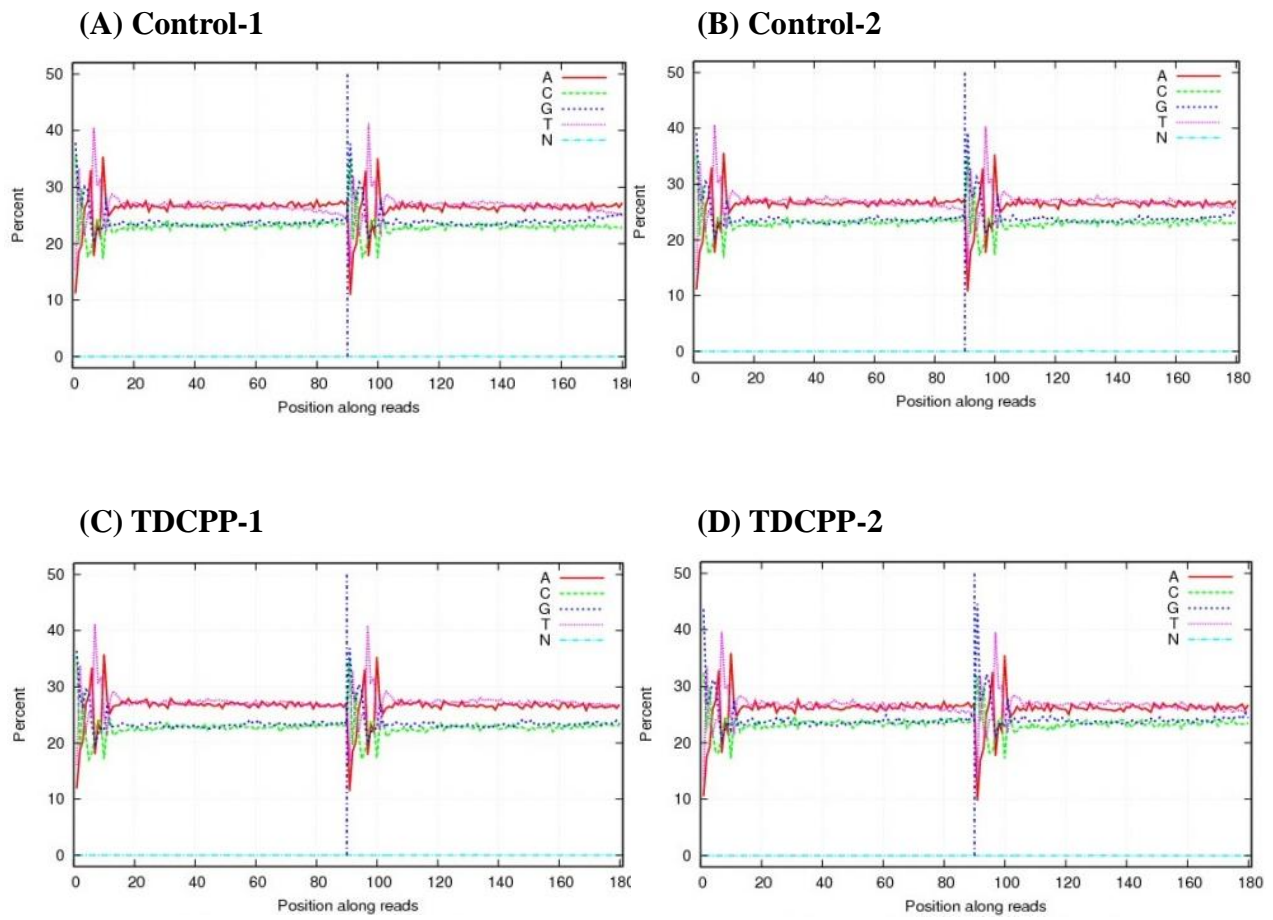

**Figure S4:** Representative images for the composition of bases. T and C curves were in accordance with A and G curves, respectively in all the samples tested, therefore, our results showed satisfactory base composition.



**Figure S5**

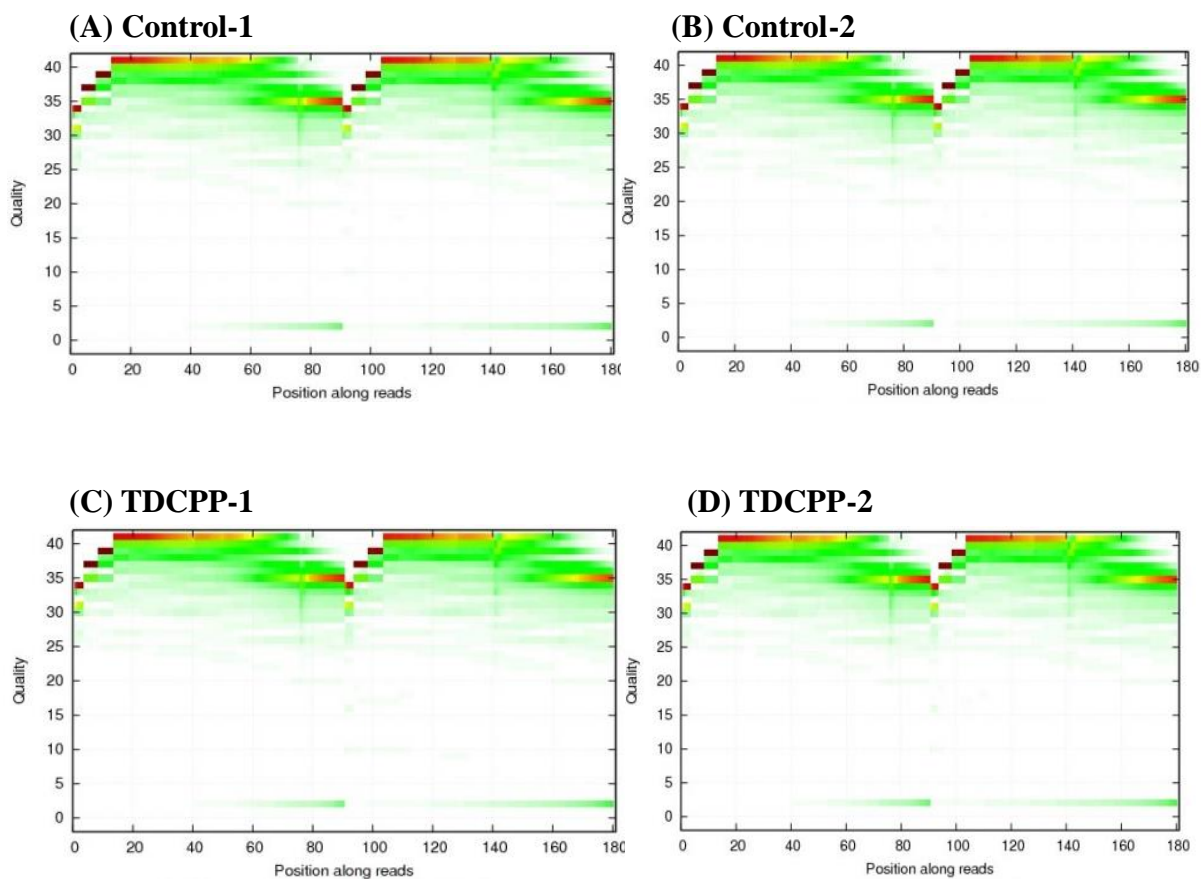

**Figure S5:** Representative images for quality distribution of bases. The percentage of the bases with low quality (<20) was very low in all the samples tested, therefore, the sequencing quality was good in the present study.

**Figure S6**

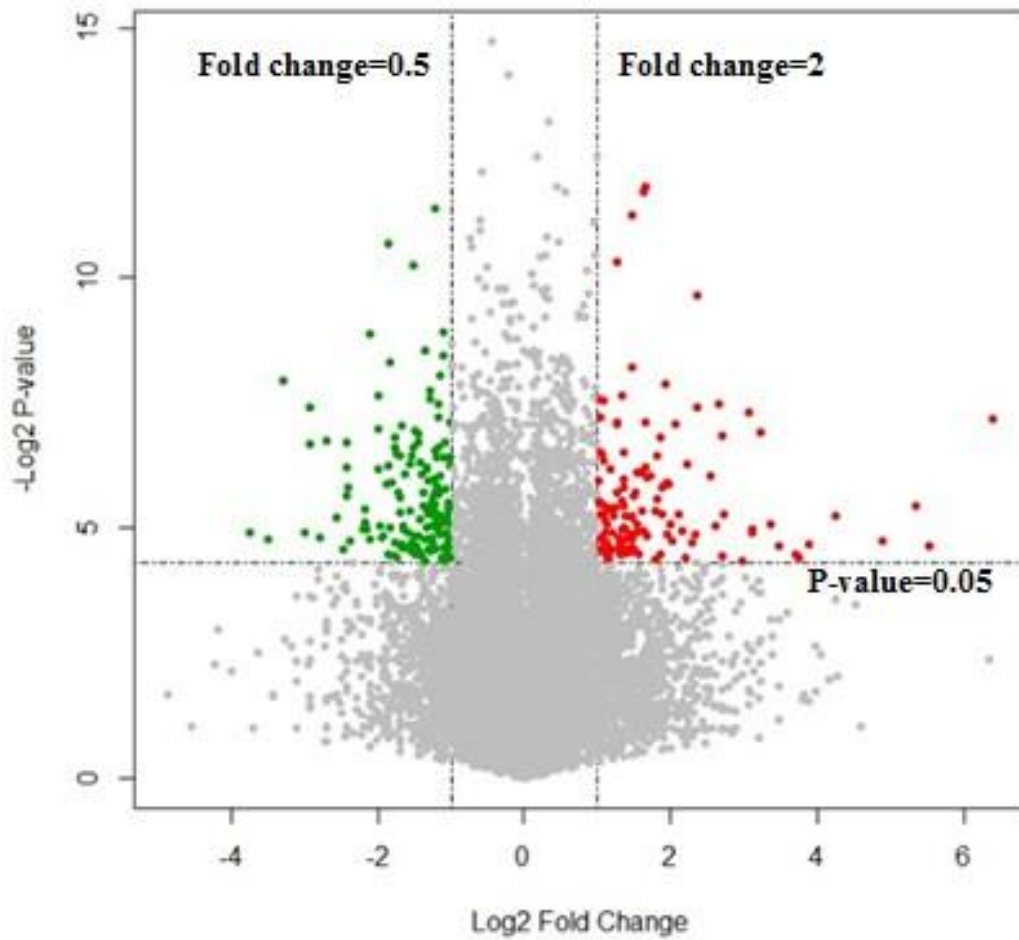

**Figure S6:** Volcano plot showing the distribution of transcripts over different fold change and *P*-value between control and treatment groups. Green plots indicate down-regulated genes, with fold change  $<0.5$  and *P*-value  $<0.05$ ; Red plots indicate up-regulated genes, with fold change  $>2$  and *P*-value  $<0.05$ .

**Figure S7**

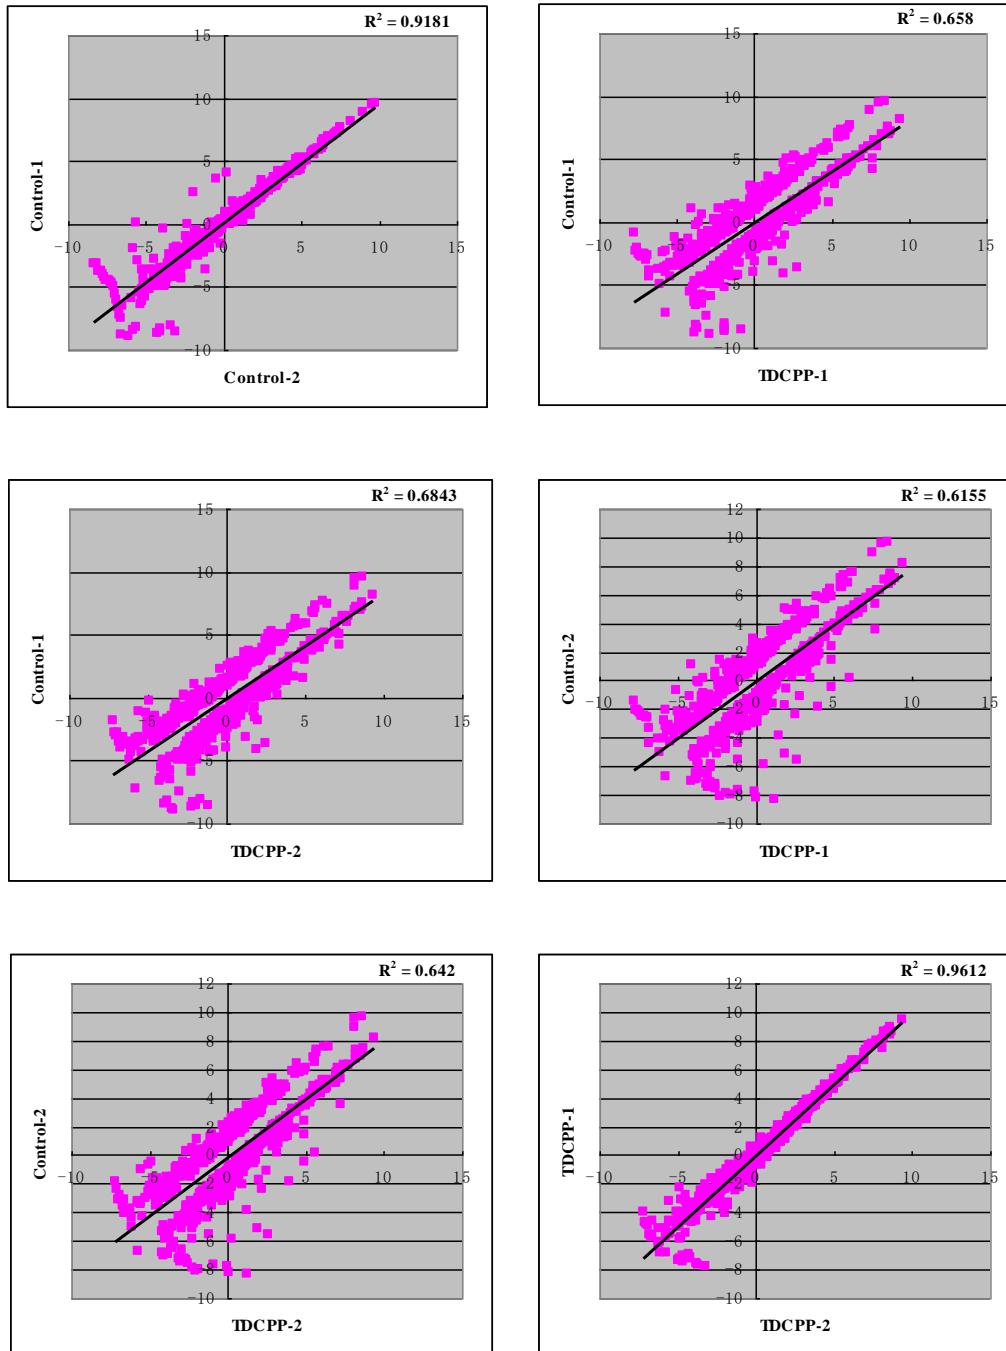

**Figure S7:** Regression analysis between two different RNA-Seq groups based on the relative (log<sub>2</sub>) RPKM value of identified 583 genes.
